# Supplementary material for: Parabrachial nucleus circuit governs neuropathic pain-like behavior
Source: PubMed Central journal article supplement (PMC7688648; doi:10.1038/s41467-020-19767-w), 2020-11-25
Supplement: 41467_2020_19767_MOESM1_ESM.pdf [file 41467_2020_19767_MOESM1_ESM.pdf]

# **Parabrachial nucleus circuit governs neuropathic pain-like behavior**

Sun et al.

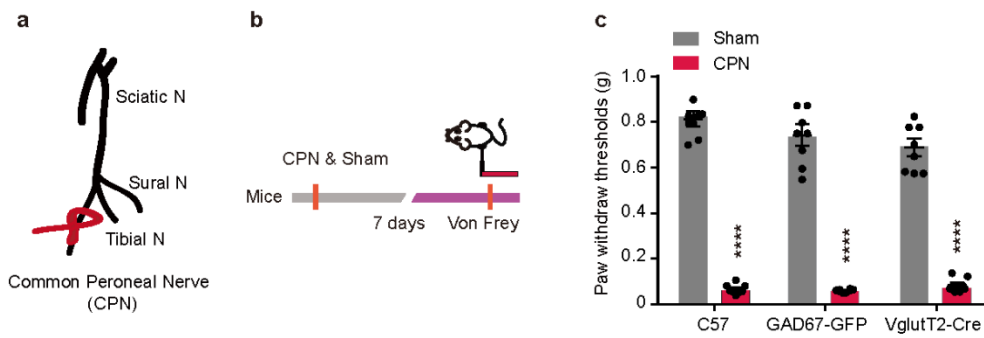

**Supplementary Figure 1. Neuropathic pain model induced by ligation of the common peroneal nerve (CPN)**

(a) Schematic of the CPN model. (b) Experimental design and timeline of the behavioral experiment. (c) Quantification of the PWT in C57, GAD67-GFP, and Vglut2-ires-Cre mice with or without CPN ligation. Two-way ANOVA followed by Bonferroni's multiple comparisons test: Sham vs CPN, C57, \*\*\*\* $P < 0.0001$ ; GAD67-GFP, \*\*\*\* $P < 0.0001$ ; Vglut2-Cre, \*\*\*\* $P < 0.0001$ ;  $F_{(2, 42)} = 2.965$ ;  $n = 8$  mice per group. All data are presented as mean  $\pm$  s.e.m. and error bars represent s.e.m. Source data are provided as a Source Data file.

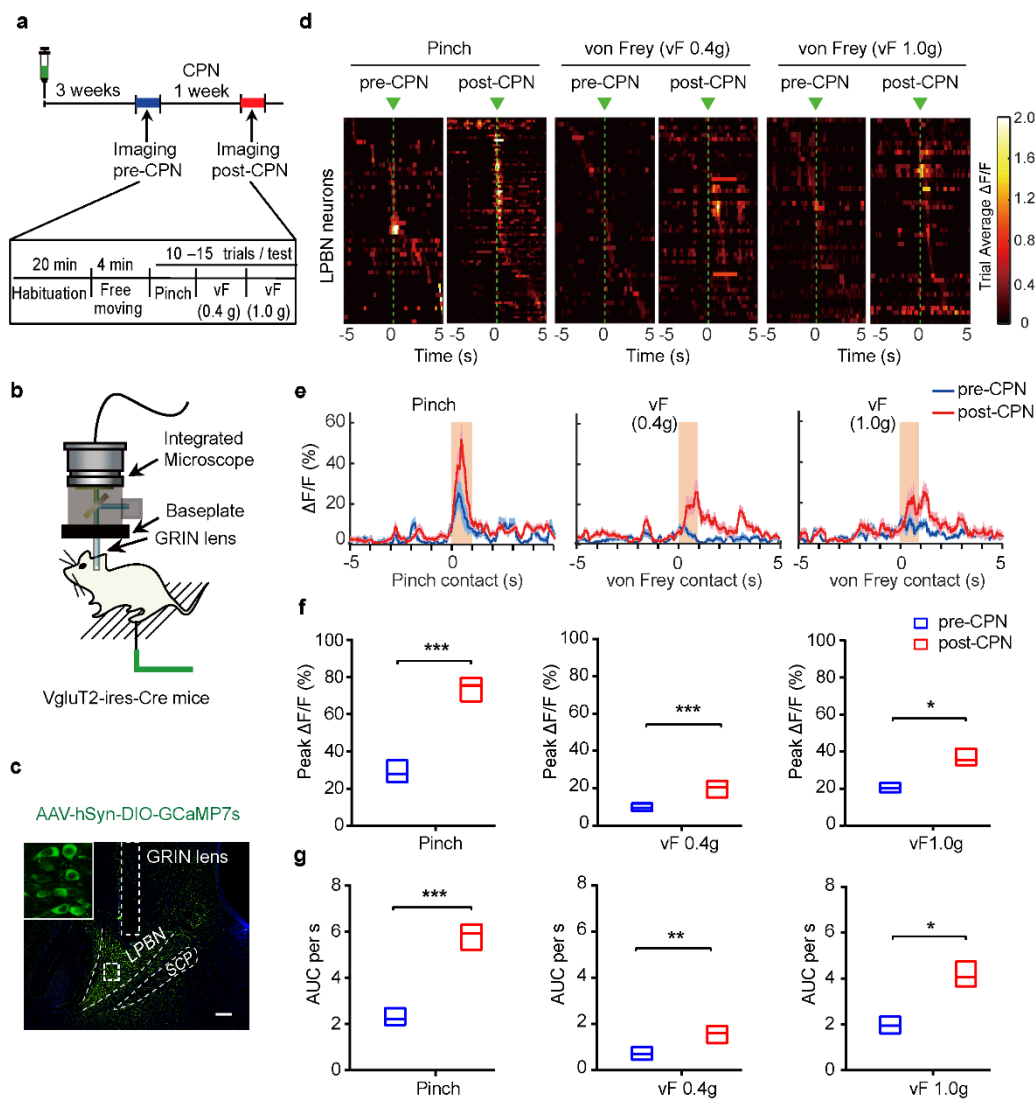

**Supplementary Figure 2. Neuropathic pain enhances the activity of glutamatergic LPBN neurons induced by noxious and mechanical stimuli.**

(a) Experimental timeline for imaging  $\text{Ca}^{2+}$  activity in Vglut2 LPBN neurons transfected with AAV-DIO-GCaMP7s. (b) Diagrams showing  $\text{Ca}^{2+}$  activity imaging in LPBN Vglut2 neurons using a head-mounted miniaturized microscope. (c) Representative image of LPBN neurons transfected with AAV-DIO-GCaMP7s in a Vglut2-ires-Cre mouse. Scale bar, 200  $\mu\text{m}$ . Inset, magnified view of rectangle in image; scale bar, 40  $\mu\text{m}$ . (d) Trial-average activity of Vglut2 neurons in response to indicated sensory stimuli before (pre-CPN) and after (post-CPN) CPN ligation. Active  $\text{Ca}^{2+}$  event traces are aligned to the time when the pinch ( $n = 56$  neurons from 4 mice), von

Frey (0.4 g) ( $n = 56$  neurons from 4 mice), or von Frey (1.0 g) ( $n = 47$  neurons from 4 mice) stimuli are applied to the hindpaw (green arrowheads). Trial averages (10–15 trials/mouse) are sorted based on peak activity time. Arrowheads indicate onset of stimulation. (e) Average response to pinch, von Frey (vF 0.4 g) and von Frey (vF 1.0 g) stimuli before (blue) and after (red) CPN ligation. Number of neurons recorded is the same as in (d). (f, g) Peak  $\Delta F/F$  (f) and area under the curve (AUC) per second (g) of GCaMP6m signals following pinch, vF 0.4 g and vF 1.0 g stimuli. Wilcoxon Signed Rank Test, (f), pinch (pre vs. post),  $***P < 0.001$ ;  $Z$  value = -3.506b;  $n = 56$  neurons from 4 mice; vF 0.4 g (pre vs. post),  $***P < 0.001$ ;  $Z$  value = -4.201b;  $n = 56$  neurons from 4 mice; vF 1.0 g (pre vs. post),  $*P = 0.0234$ ;  $n = 47$  neurons from 4 mice  $Z$  value = -2.201b (g), pinch (pre vs. post),  $***P < 0.001$ ;  $Z$  value = -3.847b;  $n = 56$  neurons from 4 mice; vF 0.4 g (pre vs. post),  $**P = 0.002$ ;  $Z$  value = -3.141b;  $n = 56$  neurons from 4 mice; vF 1.0 g (pre vs. post),  $*P = 0.043$ ;  $Z$  value = -2.027b;  $n = 47$  neurons from 4 mice. All data are presented as mean  $\pm$  s.e.m. and error bars represent s.e.m. Source data are provided as a Source Data file.

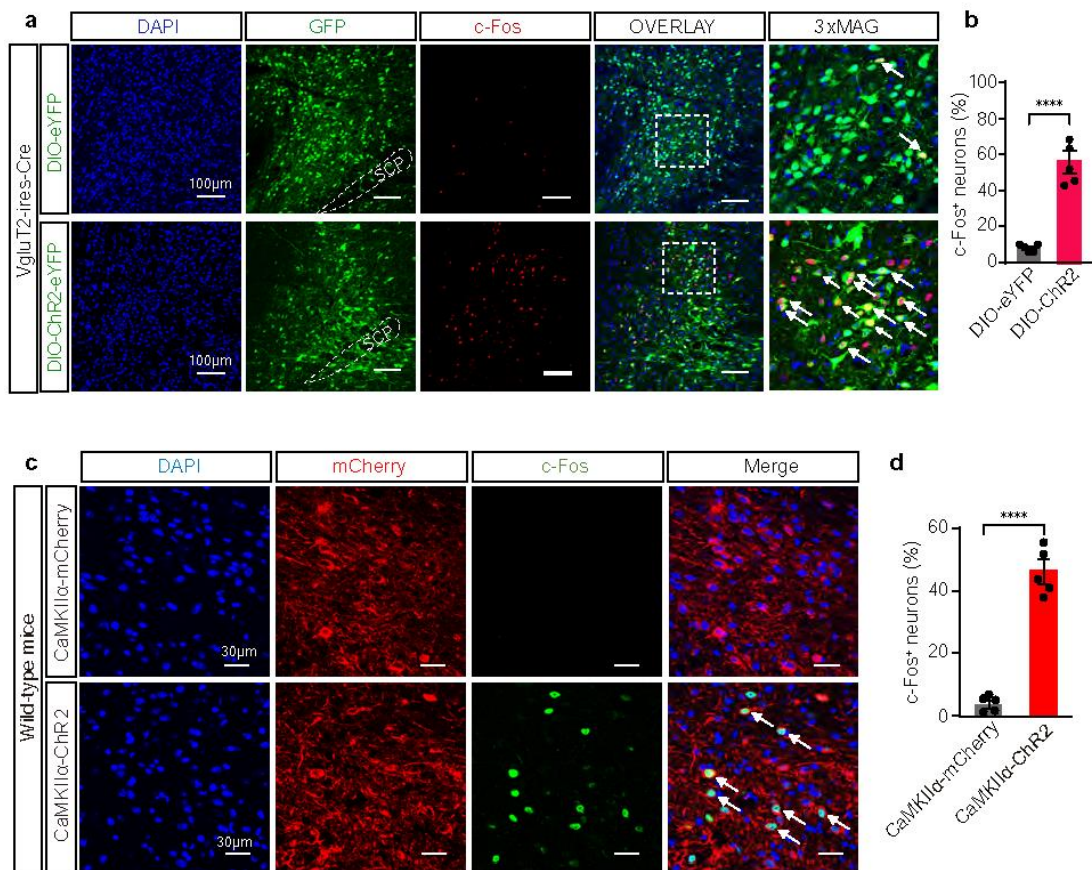

**Supplementary Figure 3. Activation and inactivation of glutamatergic LPBN neurons and c-FOS expression levels in the LPBN**

(a) Representative images showing light stimulation-induced c-Fos expression (red) in the LPBN transfected with DIO- eYFP (upper, green) and DIO-ChR2- eYFP (lower, green) in VgluT2-ires-Cre mice. 3xMAG, magnified view of the boxed areas in the overlay panels. Arrows indicate neurons co-labeled with c-FOS and ChR2- eYFP; blue, DAPI stain; scale bars, 100  $\mu$ m. (b) Proportion of neurons expressing eYFP or ChR2- eYFP that co-label with c-Fos in the LPBN as in (a). Two-tailed unpaired t test, DIO- eYFP vs DIO-ChR2, \*\*\*\* $P$  <0.0001,  $t = 9.161$  d.f. = 8. (c) Representative images showing light stimulation-induced c-Fos expression (green) in the LPBN transfected with CaMKII $\alpha$ -mCherry (upper, red) or CaMKII $\alpha$ -ChR2-mCherry (lower, red) in C57BL/6J mice. Arrows indicate c-Fos expression in CaMKII $\alpha$ <sup>+</sup> neurons; scale bars, 30  $\mu$ m. (d) Proportion of neurons expressing CaMKII $\alpha$ -mCherry or CaMKII $\alpha$ -ChR2- mCherry that co-labeled with c-Fos in the LPBN as in (c). Two-tailed unpaired t test,

CaMKII $\alpha$ -mCherry vs CaMKII $\alpha$ -ChR2, \*\*\*\* $P < 0.0001$ ,  $t = 13.73$  d.f. = 6. All data are presented as mean  $\pm$  s.e.m. and error bars represent s.e.m. Source data are provided as a Source Data file.

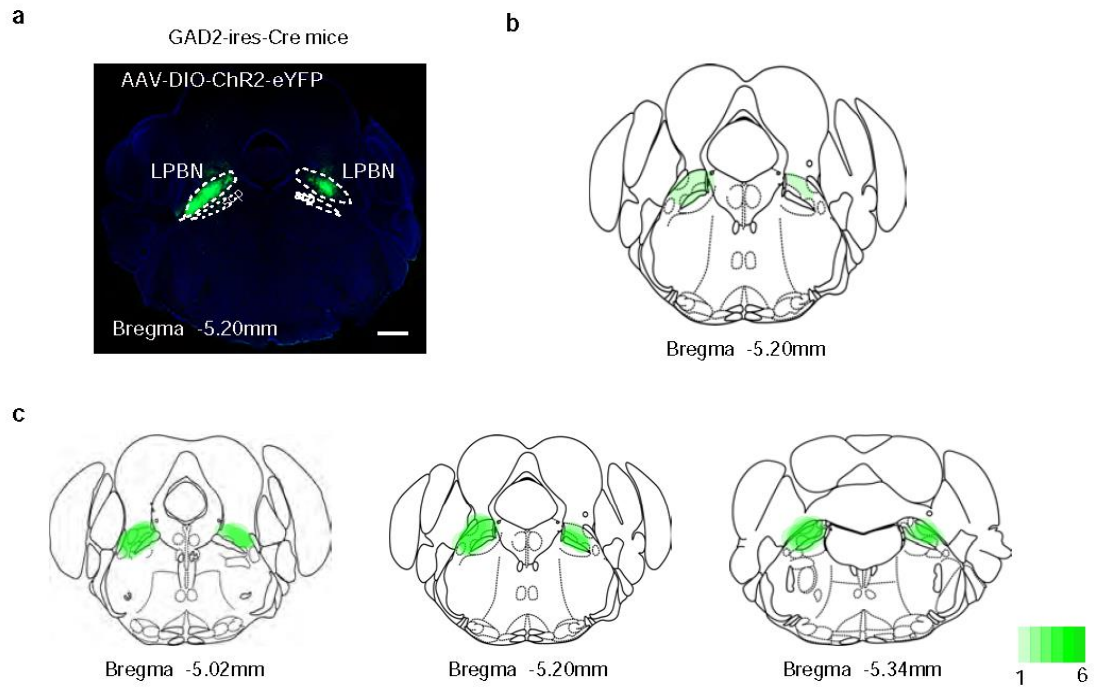

**Supplementary Figure 4. Virus infection areas in the LPBN of GAD2-ires-Cre mice.**

(a) Representative image from a GAD2-ires-Cre mouse bilaterally injected with AAV-DIO-ChR2-eYFP virus in the LPBN. Scale bar, 1 mm. (b) Depiction of virus infection area according to the fluorescent image in (a). (c) Superimposed of virus infection areas at three different coronal levels from six GAD2-ires-Cre mice bilaterally injected with AAV-DIO-ChR2-eYFP virus ( $1.25 \times 10^{12}$  genomic copies per ml, 80 nl each side) in the LPBN.  $n = 6$  mice.

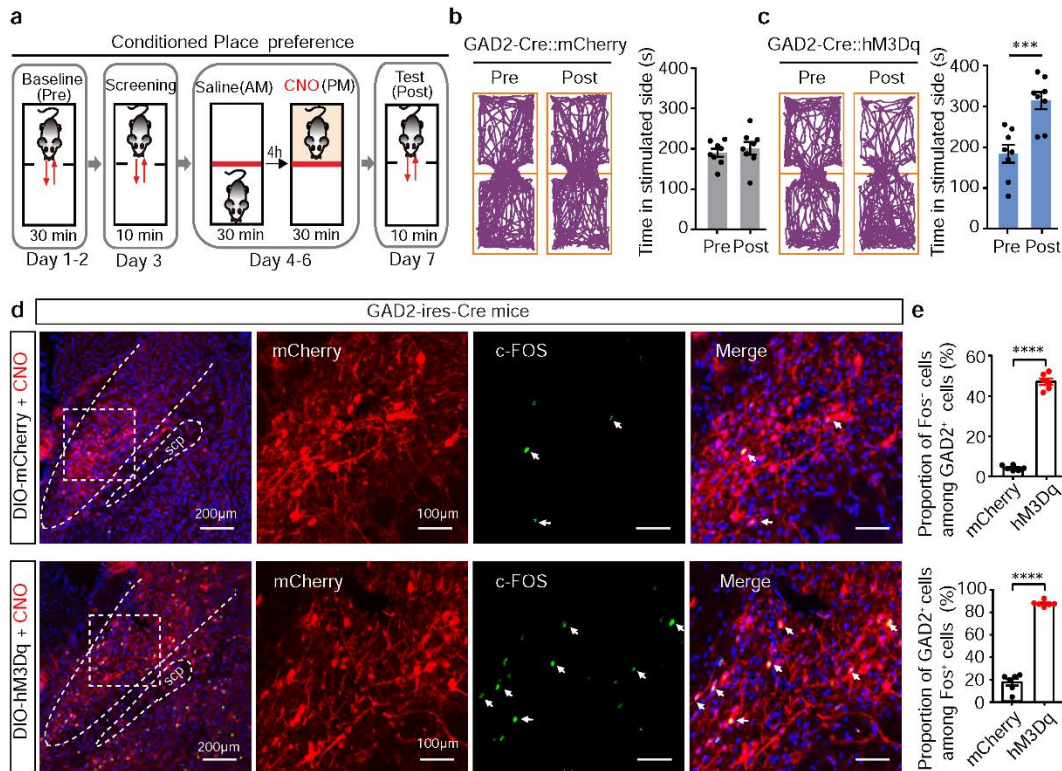

**Supplementary Figure 5. Pharmacogenetic activation of GABAergic LPBN neurons induces conditioned place preference (CPP) in CPN-ligated mice.**

(a) Schematic of the experimental design for CPP after CPN ligation for 7 days in GAD2-ires-Cre mice. (b, c) Examples of tracking maps (left) and quantification of time spent in the preferred chamber (right) in the CPP before (Pre) and after (Post) injection of CNO ( $5 \text{ mg kg}^{-1}$  i.p.) into the LPBN of GAD2-ires-Cre mice transfected with DIO-mCherry (b) or DIO-hM3Dq-mCherry (c). Unpaired t test:  $P = 0.5473$ ;  $t = 0.6167$ ; d.f. = 14 (b);  $***P = 0.0007$ ;  $t = 4.325$ ; d.f. = 14 (c).  $n = 8$  mice per group. (d) Representative images showing c-Fos expression (green, arrows) and GABAergic neurons transfected with mCherry or hM3Dq-mCherry (red) in the LPBN of GAD2-ires-Cre mice. Scale bar,  $200 \mu\text{m}$  for leftmost panels;  $100 \mu\text{m}$  for other panels; blue, DAPI stain. (e) Proportions of c-Fos-positive cells among GAD2-mCherry-expressing neurons (upper) and GAD2-mCherry-positive neurons among c-Fos expressing cells (lower) 1 h after injection of CNO in GAD2-ires-Cre mice. Unpaired t test, (upper)  $****P < 0.0001$ ;  $t = 25.17$ ; d.f. = 10; (lower)  $****P < 0.0001$ ;  $t = 15.3$ ; d.f. = 10;  $n = 6$



mice per group. All data are presented as mean  $\pm$  s.e.m. and error bars represent s.e.m.  
Source data are provided as a Source Data file.

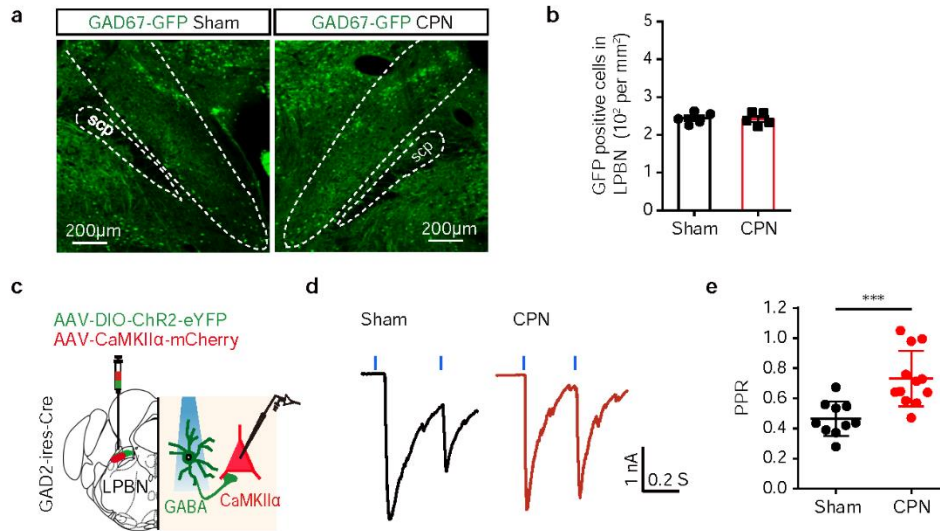

### Supplementary Figure 6. Effects of CPN-treatment on GABAergic LPBN neurons.

**(a)** Representative images showing GAD67-GFP-expressing neurons in the LPBN from sham (left) and CPN-treated (right) GAD67-GFP mice. **(b)** Summarized density of GAD67-GFP-expressing neurons in the LPBN from sham and CPN-treated mice as in **(a)**. **(c)** Schematic of patch-clamp recording in brain slices from GAD2-ires-Cre mice transfected with AAV-CaMKII $\alpha$ -mCherry and AAV-DIO-ChR2-eYFP virus in the LPBN. **(d)** Representative traces of evoked IPSPs in LPBN<sup>CaMKII $\alpha$</sup>  neurons induced by paired pulses of light stimulation (473 nm, 5-ms pulses at an interval of 200 ms) of LPBN GABAergic neurons in Sham (left) and CPN treated (right) GAD2-ires-Cre mice. **(e)** Summarized paired-pulse ratio (PPR, calculated by dividing the amplitude of the second pulse by that of the first) as in **(d)**. Two-sided unpaired t-test,  $t = 3.979$ , d.f. = 20, \*\*\*  $P = 0.0007$ .  $n = 10$  neurons from 6 mice (Sham) and 12 neurons from 6 mice (CPN). All data are presented as mean  $\pm$  s.e.m. and error bars represent s.e.m. Source data are provided as a Source Data file.

**Supplementary Table 1. Statistical Data**

| <b>Fig</b> | <b>Comparison</b>                                                                                                                                     | <b>Analysis</b>                                                  | <b>P value, F/T/W/U value</b>                                                                                                                                                                                              | <b>N</b>                |
|------------|-------------------------------------------------------------------------------------------------------------------------------------------------------|------------------------------------------------------------------|----------------------------------------------------------------------------------------------------------------------------------------------------------------------------------------------------------------------------|-------------------------|
| 1c         | c-Fos <sup>+</sup> neurons number in the CaMKII $\alpha$ vs GAD67 group with Sham operation or CPN ligation                                           | Two-way ANOVA followed by Bonferroni's multiple comparisons test | Sham vs CPN: CaMKII $\alpha$ , ****P <0.0001; GAD67, P >0.9999; CaMKII $\alpha$ vs GAD67: Sham, P = 0.0647; CPN, ****P<0.0001; F (1, 8) = 364.9;                                                                           | 8 sections from 5 mice  |
| 1d         | Proportions of CaMKII $\alpha$ -positive cells and GAD67-GFP-positive cells co-expressed with c-Fos in the LPBN after Sham operation or CPN ligation. | Two-way ANOVA followed by Bonferroni's multiple comparisons test | Sham vs CPN: Fos <sup>+</sup> /CaMKII $\alpha$ , ****P <0.0001; Fos <sup>+</sup> /Gad67, P = 0.6574; Fos <sup>+</sup> /CaMKII $\alpha$ vs Fos <sup>+</sup> /Gad67: Sham, P = 0.1660, CPN, ****P <0.0001; F (1, 16) = 93.72 | 5 sections from 5 mice. |
| 1k         | Averaged peak $\Delta F/F$ of GCaMP7s and eYFP group with Sham operation or CPN ligation                                                              | Two-way ANOVA followed by Bonferroni's multiple comparisons test | Sham vs CPN: eYFP, P >0.9999; GCaMP7s, ****P <0.0001; eYFP vs GCaMP7s: Sham,*P = 0.0149; CPN, ****P<0.0001; F (1, 8) = 47.62                                                                                               | 6 mice per group        |
| 1k         | Averaged area under the curve (AUC) per second of GCaMP7s and eYFP group with Sham operation or CPN ligation                                          | Two-way ANOVA followed by Bonferroni's multiple comparisons test | Sham vs CPN: eYFP, P = 0.8165; GCaMP7s, ****P<0.0001; eYFP vs GCaMP7s: Sham, *P = 0.0185; CPN, ****P <0.0001; F (1, 8) = 23.65.                                                                                            | 6 mice per group        |
| 1n         | Averaged peak $\Delta F/F$ of GCaMP7s and eYFP group with Sham operation or CPN ligation                                                              | Two-way ANOVA followed by Bonferroni's multiple comparisons test | Sham vs CPN : eYFP, P >0.9999; GCaMP7s, P >0.9999; eYFP vs GCaMP7s: Sham, *P = 0.0164; CPN, P = 0.0623; F (1, 20) = 0.1893.                                                                                                | 6 mice per group        |
| 1n         | Averaged area under the curve (AUC) per second of GCaMP7s and eYFP group with Sham                                                                    | Two-way ANOVA followed by                                        | Sham vs CPN: eYFP, P >0.9999; GCaMP7s, P = 0.5367; eYFP vs GCaMP7s:                                                                                                                                                        | 6 mice per group        |

|    |                                                                                                         |                                                                  |                                                                                                                                                                                                                                                                             |                   |
|----|---------------------------------------------------------------------------------------------------------|------------------------------------------------------------------|-----------------------------------------------------------------------------------------------------------------------------------------------------------------------------------------------------------------------------------------------------------------------------|-------------------|
|    | operation or CPN ligation                                                                               | Bonferroni's multiple comparisons test                           | Sham, *P = 0.0234;<br>CPN, P = 0.2663;<br>F (1, 20) = 0.7316.                                                                                                                                                                                                               |                   |
| 2d | Paw-withdraw thresholds of Chr2 and eYFP group with Sham operation or CPN ligation                      | Two-way ANOVA followed by Bonferroni's multiple comparisons test | DIO-eYFP, Sham vs CPN:<br>Off, ****P<0.0001;<br>On, ****P <0.0001;<br>DIO-ChR2-eYFP, Sham vs CPN:<br>Off, ****P <0.0001;<br>On, P =0.1034;<br>DIO-ChR2-eYFP,Sham:<br>Off vs On, ****P <0.0001;<br>DIO-eYFP vs DIO-ChR2-eYFP: Sham(On), ****P <0.0001;<br>F (3, 44) = 23.77; | 12 mice per group |
| 2e | latency of the thermal paw-withdraw response of Chr2 and eYFP group with Sham operation or CPN ligation | Two-way ANOVA followed by Bonferroni's multiple comparisons test | DIO-eYFP, Off vs On,:<br>Sham, P = 0.0614;<br>CPN, P >0.9999;<br>DIO-ChR2-eYFP, Off vs On:<br>Sham, ****P <0.0001;<br>CPN,P >0.9999;<br>CPN, DIO-eYFP vs DIO-CHR2-eYFP:<br>Off, P >0.9999;<br>On, P >0.9999;<br>F (3, 44) = 109.6.                                          | 12 mice per group |
| 2h | Time spent in the stimulated chamber in the RTPA test: pre vs light vs post                             | One-way ANOVA followed by Bonferroni's multiple comparisons test | Pre vs Light, P >0.9999;<br>Pre vs Post, P = 0.4438;<br>Light vs Post, P = 0.9724;<br>F (2, 15) = 1.208;                                                                                                                                                                    | 6 mice            |
| 2j | Time spent in the stimulated chamber in the RTPA test: pre vs light vs post                             | One-way ANOVA followed by Bonferroni's multiple comparisons test | Pre vs Light, ****P <0.0001;<br>Pre vs Post, ***P = 0.0006;<br>Light vs Post, ****P = 0.0002;<br>F (2, 18) = 48.88;                                                                                                                                                         | 7 mice            |
| 3b | PWT in mice injected with AAV-CaMKII $\alpha$ -Chr2-mCherry and                                         | Two-way ANOVA followed by                                        | CaMKII $\alpha$ -mCherry vs CaMKII $\alpha$ -Chr2:<br>Pre, P = 0.9523;                                                                                                                                                                                                      | 10                |

|    |                                                                                                                               |                                                                  |                                                                                                                                                                                                                                                                                                                                                                                    |                   |
|----|-------------------------------------------------------------------------------------------------------------------------------|------------------------------------------------------------------|------------------------------------------------------------------------------------------------------------------------------------------------------------------------------------------------------------------------------------------------------------------------------------------------------------------------------------------------------------------------------------|-------------------|
|    | AAV-CaMKII $\alpha$ -mCherry group                                                                                            | Bonferroni's multiple comparisons test                           | Light, ****P <0.0001;<br>Post, P = 0.8294;<br>CaMKII $\alpha$ -mCherry:<br>Pre vs Light, P = 0.9494;<br>Pre vs Post, P = 0.7062;<br>Light vs Post, P = 0.5162;<br>CaMKII $\alpha$ -Chr2:<br>Pre vs Light, ****P <0.0001;<br>Light vs Post, ****P <0.0001;<br>Pre vs Post, P = 0.5665;<br>F (2, 11) = 36.83.                                                                        | mice per group    |
| 3c | Thermal paw-withdrawal latency in mice injected with AAV-CaMKII $\alpha$ -Chr2-mCherry and AAV-CaMKII $\alpha$ -mCherry group | Two-way ANOVA followed by Bonferroni's multiple comparisons test | CaMKII $\alpha$ -mCherry:<br>Pre vs Light, P >0.9999;<br>Light vs Post, P >0.9999;<br>Pre vs Post, P = 0.8261;<br>CaMKII $\alpha$ -Chr2:<br>Pre vs Light, ****P <0.0001;<br>Light vs Post, ****P <0.0001;<br>Pre vs Post, P = 0.9360;<br>CaMKII $\alpha$ -mCherry vs CaMKII $\alpha$ -Chr2:<br>Pre, P >0.9999;<br>Light, ****P <0.0001;<br>Post, P = 0.9534;<br>F (2, 21) = 36.83; | 10 mice per group |
| 3d | Time spent in the stimulated chamber in the RTPA test: pre vs light vs post                                                   | One-way ANOVA followed by Bonferroni's multiple comparisons test | Pre vs Light, P >0.9999;<br>Pre vs Post, P = 0.7691;<br>Light vs Post, P >0.9999;<br>F (2, 15) = 0.8074;                                                                                                                                                                                                                                                                           | 6 mice            |
| 3e | Time spent in the stimulated chamber in the RTPA test: pre vs light vs post                                                   | One-way ANOVA followed by Bonferroni's multiple comparisons test | Pre vs Light, ****P <0.0001;<br>Pre vs Post, ***P = 0.0006;<br>Light vs Post, **P = 0.0013;<br>F (2, 15) = 43.77;                                                                                                                                                                                                                                                                  | 6 mice            |
| 3h | Distance moved in the OFT: pre vs light vs post                                                                               | Two-way ANOVA followed by                                        | CaMKII $\alpha$ -mCherry vs CaMKII $\alpha$ -Chr2:<br>Pre, P >0.9999;                                                                                                                                                                                                                                                                                                              | 5                 |

|    |                                                                                             |                                                                  |                                                                                                                                                                             |                   |
|----|---------------------------------------------------------------------------------------------|------------------------------------------------------------------|-----------------------------------------------------------------------------------------------------------------------------------------------------------------------------|-------------------|
|    |                                                                                             | Bonferroni's multiple comparisons test                           | Light, $P > 0.9999$ ;<br>Post, $P = 0.7626$ ;<br>$F(2, 12) = 0.6693$ ;                                                                                                      | mice per group    |
| 3h | Ratio of time spent in the periphery and center in the OFT: pre vs light vs post            | Two-way ANOVA followed by Bonferroni's multiple comparisons test | CaMKII $\alpha$ -mCherry vs CaMKII $\alpha$ -ChR2<br>Pre, $P > 0.9999$ ;<br>Light, $P > 0.9999$ ;<br>Post, $P > 0.9999$ ;<br>$F(2, 12) = 0.3369$ ;                          | 5 mice per group  |
| 4b | Paw-withdraw thresholds of eNpHR and mCherry group with Sham operation                      | Two-way ANOVA followed by Bonferroni's multiple comparisons test | mCherry vs eNpHR:<br>Off, $P = 0.1361$ ;<br>On, **** $P < 0.0001$ ;<br>Off vs On:<br>mCherry, $P = 0.0763$ ;<br>eNpHR (Off vs On), * $P = 0.0137$ ;<br>$F(3, 44) = 49.64$ ; | 12 mice per group |
| 4b | Paw-withdraw thresholds of eNpHR and mCherry group with CPN ligation                        | Two-way ANOVA followed by Bonferroni's multiple comparisons test | mCherry vs eNpHR<br>Off, $P = 0.2472$ ;<br>On, **** $P < 0.0001$ ;<br>Off vs On:<br>mCherry, $P > 0.9999$ ;<br>eNpHR, **** $P < 0.0001$ ;<br>$F(3, 33) = 47.29$ ;           | 12 mice per group |
| 4c | Latency of the thermal paw-withdraw response of eNpHR and mCherry group with Sham operation | Two-way ANOVA followed by Bonferroni's multiple comparisons test | mCherry vs eNpHR:<br>Off, $P = 0.6455$ ;<br>On, **** $P < 0.0001$ ;<br>Off vs On:<br>mCherry, $P = 0.0602$ ;<br>eNpHR, * $P = 0.0107$ ;<br>$F(1, 22) = 18.17$ ;             | 12 mice per group |
| 4c | Latency of the thermal paw-withdraw response of eNpHR and mCherry group with CPN ligation   | Two-way ANOVA followed by Bonferroni's multiple comparisons test | mCherry vs eNpHR:<br>Off, $P = 0.1496$ ;<br>On, **** $P < 0.0001$ ;<br>Off vs On:<br>mCherry, $P = 0.8663$ ;<br>eNpHR, **** $P < 0.0001$ ;<br>$F(1, 22) = 96.64$ ;          | 12 mice per group |
| 4f | Time spent in the stimulated chamber of mCherry group in the                                | One-way ANOVA followed by Bonferroni's                           | Pre vs Light, $P = 0.9418$ ;<br>Pre vs Post, $P > 0.9999$ ;<br>Light vs Post, $P > 0.9999$ ;<br>$F(2, 12) = 0.6869$ ;                                                       | 5 mice            |

|    |                                                                                            |                                                                  |                                                                                                                                                                                                                                                                                                              |                  |
|----|--------------------------------------------------------------------------------------------|------------------------------------------------------------------|--------------------------------------------------------------------------------------------------------------------------------------------------------------------------------------------------------------------------------------------------------------------------------------------------------------|------------------|
|    | RTPP test: pre vs light vs post                                                            | multiple comparisons test                                        |                                                                                                                                                                                                                                                                                                              |                  |
| 4g | Time spent in the stimulated chamber of eNpHR group in the RTPP test: pre vs light vs post | One-way ANOVA followed by Bonferroni's multiple comparisons test | Pre vs Light, **P = 0.0047;<br>Pre vs Post, *P = 0.0319;<br>Light vs Post, P = 0.9531;<br>F (2, 12) = 8.907;                                                                                                                                                                                                 | 5 mice           |
| 4j | Distance moved in the OFT: pre vs light vs post                                            | Two-way ANOVA followed by Bonferroni's multiple comparisons test | mCherry vs eNpHR:<br>Pre, P = 0.1055;<br>Light, P = 0.4452;<br>Post, P = 0.2445);<br>mCherry:<br>Pre vs Light, P > 0.9999;<br>Pre vs Post, P = 0.7484;<br>Light vs Post, P > 0.9999;<br>eNpHR:<br>Pre vs Light, P > 0.9999;<br>Pre vs Post, P > 0.9999;<br>Light vs Post, P = 0.9286;<br>F (2, 24) = 0.1895. | 5 mice per group |
| 4k | Ratio of time spent in the periphery and center in the OFT: pre vs light vs post           | Two-way ANOVA followed by Bonferroni's multiple comparisons test | mCherry vs eNpHR:<br>Pre, P > 0.9999;<br>Light, P > 0.9999;<br>Post, P = 0.7001;<br>mCherry:<br>Pre vs Light, P = 0.6961;<br>Pre vs Post, P > 0.9999;<br>Light vs Post, P = 0.9471;<br>eNpHR:<br>Pre vs Light, P > 0.9999;<br>Pre vs Post, P = 0.7485;<br>Light vs Post, P = 0.8849;<br>F (2, 24) = 1.099.   | 5 mice per group |
| 4l | Distance moved in the OFT: pre vs light vs post                                            | Two-way ANOVA followed by Bonferroni's multiple comparisons test | mCherry vs eNpHR:<br>Pre, P = 0.6075;<br>Light, P > 0.9999;<br>Post, P = 0.8437;<br>mCherry:<br>Pre vs Light, P = 0.0520;<br>Pre vs Post, P = 0.5881;<br>Light vs Post, P = 0.6963;                                                                                                                          | 5 mice per group |

|    |                                                                                          |                                                                  |                                                                                                                                                                                                                                                                                                                                                                     |                   |
|----|------------------------------------------------------------------------------------------|------------------------------------------------------------------|---------------------------------------------------------------------------------------------------------------------------------------------------------------------------------------------------------------------------------------------------------------------------------------------------------------------------------------------------------------------|-------------------|
|    |                                                                                          |                                                                  | eNpHR:<br>Pre vs Light, $P > 0.9999$ ;<br>Pre vs Post, $P = 0.8645$ ;<br>Light vs Post, $P > 0.9999$ ;<br>$F(2, 12) = 0.5950$ .                                                                                                                                                                                                                                     |                   |
| 4m | Ratio of time spent in the periphery and center in the OFT: pre vs light vs post         | Two-way ANOVA followed by Bonferroni's multiple comparisons test | mCherry vs eNpHR:<br>Pre, $P = 0.1582$ ;<br>Light, $P > 0.9999$ ;<br>Post, $P > 0.9999$ ;<br>$F(2, 12) = 0.5402$ ;<br>mCherry:<br>Pre vs Light, $P = > 0.9999$ ;<br>Pre vs Post, $P > 0.9999$ ;<br>Light vs Post, $P > 0.9999$ ;<br>eNpHR:<br>Pre vs Light, $P > 0.9999$ ;<br>Pre vs Post, $P = 0.7637$ ;<br>Light vs Post, $P > 0.9999$ ;<br>$F(2, 24) = 0.6976$ . | 5 mice per group  |
| 5b | Paw-withdraw thresholds of eNpHR and eYFP group with Sham operation                      | Two-way ANOVA followed by Bonferroni's multiple comparisons test | eYFP vs eNpHR:<br>Off, $P > 0.9999$ ;<br>On, **** $P < 0.0001$ ;<br>Off vs On:<br>eYFP, $P > 0.9999$ ;<br>eNpHR, *** $P = 0.0005$ ;                                                                                                                                                                                                                                 | 12 mice per group |
| 5b | Paw-withdraw thresholds of eNpHR and eYFP group with CPN ligation                        | Two-way ANOVA followed by Bonferroni's multiple comparisons test | eYFP vs eNpHR:<br>Off, $P > 0.9999$ ;<br>On, **** $P < 0.0001$ ;<br>Off vs On:<br>eYFP, $P > 0.9999$ ;<br>eNpHR, **** $P < 0.0001$ ;<br>$F(3, 36) = 12.56$ ;                                                                                                                                                                                                        | 12 mice per group |
| 5c | Latency of the thermal paw-withdraw response of eNpHR and eYFP group with Sham operation | Two-way ANOVA followed by Bonferroni's multiple comparisons test | eYFP vs eNpHR:<br>Off, $P > 0.9999$ ;<br>On, **** $P < 0.0001$ ;<br>Off vs On:<br>eYFP, $P = 0.0602$ ;<br>eNpHR, **** $P < 0.0001$ ;                                                                                                                                                                                                                                | 12 mice per group |
| 5c | Latency of the thermal paw-withdraw response of eNpHR and eYFP group with CPN ligation   | Two-way ANOVA followed by                                        | eYFP vs eNpHR:<br>Off, $P > 0.9999$ ;<br>On, **** $P < 0.0001$ ;<br>Off vs On:                                                                                                                                                                                                                                                                                      | 12 mice per group |



|    |                                                                                            |                                                                  |                                                                                                                                                                                                                                                                                                     |                  |
|----|--------------------------------------------------------------------------------------------|------------------------------------------------------------------|-----------------------------------------------------------------------------------------------------------------------------------------------------------------------------------------------------------------------------------------------------------------------------------------------------|------------------|
|    |                                                                                            | Bonferroni's multiple comparisons test                           | eYFP , P = 0.8663;<br>eNpHR, ****P <0.0001;<br>F (3, 66) = 16.42;                                                                                                                                                                                                                                   |                  |
| 5e | Time spent in the stimulated chamber of eYFP group in the RTPP test: pre vs light vs post  | One-way ANOVA followed by Bonferroni's multiple comparisons test | Pre vs Light, P = 0.0672;<br>Pre vs Post, P = 0.6642;<br>Light vs Post, P = 0.6709;<br>F (2, 15) = 1.754;                                                                                                                                                                                           | 6 mice per group |
| 5f | Time spent in the stimulated chamber of eNpHR group in the RTPP test: pre vs light vs post | One-way ANOVA followed by Bonferroni's multiple comparisons test | Pre vs Light, ****P <0.0001;<br>Pre vs Post, **P = 0.0032;<br>Light vs Post, P = 0.1123;<br>F (2, 12) = 0.09877;                                                                                                                                                                                    | 6 mice per group |
| 5h | Distance moved in the OFT: pre vs light vs post                                            | Two-way ANOVA followed by Bonferroni's multiple comparisons test | eYFP vs eNpHR:<br>Pre, P = 0.1215;<br>Light, P = 0.2092;<br>Post, P = 0.8789;<br>eYFP :<br>Pre vs Light, P = 0.534;<br>Pre vs Post, P = 0.0887;<br>Light vs Post, P >0.9999;<br>eNpHR:<br>Pre vs Light, P = 0.8560;<br>Pre vs Post, P = 0.8108;<br>Light vs Post, P >0.9999;<br>F (2, 15) = 0.3595. | 6 mice per group |
| 5i | Ratio of time spent in the periphery and center in the OFT: pre vs light vs post           | Two-way ANOVA followed by Bonferroni's multiple comparisons test | eYFP vs eNpHR:<br>Pre, P = 0.4586;<br>Light, P = 0.5750;<br>Post, P >0.9999;<br>eYFP:<br>Pre vs Light, P >0.9999;<br>Pre vs Post, P = 0.5398;<br>Light vs Post, P = 0.6181;<br>eNpHR:<br>Pre vs Light, P >0.9999;<br>Pre vs Post, P = 0.9148;<br>Light vs Post, P >0.9999;<br>F (2, 15) = 1.436.    | 6 mice per group |

|    |                                                                                           |                                                                  |                                                                                                                                                                                                                                                                                                     |                  |
|----|-------------------------------------------------------------------------------------------|------------------------------------------------------------------|-----------------------------------------------------------------------------------------------------------------------------------------------------------------------------------------------------------------------------------------------------------------------------------------------------|------------------|
| 5j | Distance moved in the OFT: pre vs light vs post                                           | Two-way ANOVA followed by Bonferroni's multiple comparisons test | eYFP vs eNpHR:<br>Pre, P = 0.1549;<br>Light, P = 0.0987;<br>Post, P = 0.2054;<br>eYFP:<br>Pre vs Light, P >0.9999;<br>Pre vs Post, P = 0.6249;<br>Light vs Post, P = 0.7763;<br>eNpHR:<br>Pre vs Light, P >0.9999;<br>Pre vs Post, P = 0.7828;<br>Light vs Post, P >0.9999;<br>F (2, 15) = 0.03084. | 6 mice per group |
| 5k | Ratio of time spent in the periphery and center in the OFT: pre vs light vs post          | Two-way ANOVA followed by Bonferroni's multiple comparisons test | eYFP vs eNpHR:<br>Pre; Light; Post, P >0.9999;<br>eYFP:<br>Pre vs Light, P >0.9999;<br>Pre vs Post, P >0.9999;<br>Light vs Post, P >0.9999;<br>eNpHR:<br>Pre vs Light, P >0.9999;<br>Pre vs Post, P >0.9999;<br>Light vs Post, P >0.9999;<br>F (2, 15) = 0.1268.                                    | 6 mice per group |
| 6b | PWT in vGAT-ChR2-eYFP mice with Sham operation or CPN ligation                            | Two-way ANOVA followed by Bonferroni's multiple comparisons test | Sham vs CPN:<br>Pre, ****P <0.0001;<br>Light, ***P = 0.0003;<br>Post, ****P <0.0001;<br>CPN:<br>Pre vs Light, ****P <0.0001;<br>Light vs Post, ****P <0.0001;<br>F (1, 8) = 470.5;                                                                                                                  | 8 mice per group |
| 6c | Thermal paw-withdrawal latency in vGAT-ChR2-eYFP mice with Sham operation or CPN ligation | Two-way ANOVA followed by Bonferroni's multiple comparisons test | Sham:<br>Pre vs Light, P >0.9999;<br>Pre vs Post, P >0.9999;<br>Light vs Post, P >0.9999;<br>CPN:<br>Pre vs Light, ****P <0.0001;<br>Pre vs Post, P >0.9999;<br>Light vs Post, ****P <0.0001;                                                                                                       | 8 mice per group |

|    |                                                                                                         |                                                                  |                                                                                                                                                                                                                                                                                     |                   |
|----|---------------------------------------------------------------------------------------------------------|------------------------------------------------------------------|-------------------------------------------------------------------------------------------------------------------------------------------------------------------------------------------------------------------------------------------------------------------------------------|-------------------|
|    |                                                                                                         |                                                                  | Sham vs CPN:<br>Pre, ****P <0.0001;<br>Light, P = 0.1903,<br>Post, ****P <0.0001,                                                                                                                                                                                                   |                   |
| 6e | Time spent in the stimulated chamber in the RTPP test: pre vs light vs post                             | One-way ANOVA followed by Bonferroni's multiple comparisons test | Pre vs Light, P = 0.0572;<br>Pre vs Post, P = 0.7494;<br>Light vs Post, P = 0.2047;<br>F(2, 15) = 3.3792;                                                                                                                                                                           | 6 mice per group  |
| 6g | Time spent in the stimulated chamber in the RTPP test: pre vs light vs post                             | One-way ANOVA followed by Bonferroni's multiple comparisons test | Pre vs Light, **P = 0.0013;<br>Pre vs Post, *P = 0.0153;<br>Light vs Post, P = 0.4553;<br>F (2, 15) = 10.49;                                                                                                                                                                        | 7 mice per group  |
| 6i | Paw-withdraw thresholds of Chr2 and eYFP group with Sham operation or CPN ligation                      | Two-way ANOVA followed by Bonferroni's multiple comparisons test | Sham, Off vs On:<br>eYFP, P >0.9999;<br>Chr2, P >0.9999;<br>Sham vs CPN, Off:<br>eYFP, ****P <0.0001;<br>Chr2, ****P <0.0001;<br>Sham vs CPN ,On:<br>eYFP, ****P <0.0001;<br>Off vs On, CPN:<br>Chr2, ****P <0.0001;<br>F (3, 12) = 42.14;                                          | 10 mice per group |
| 6j | Latency of the thermal paw-withdraw response of Chr2 and eYFP group with Sham operation or CPN ligation | Two-way ANOVA followed by Bonferroni's multiple comparisons test | Sham, Off vs On:<br>eYFP, P = 0.9999,<br>Chr2, P = 0.9981;<br>Sham vs CPN, Off:<br>eYFP, **P = 0.0022;<br>Chr2, *P = 0.0128;<br>Sham vs CPN, On:<br>eYFP, ***P = 0.0004;<br>eYFP vs Chr2, On:<br>CPN, **P = 0.0021;<br>CPN, Off vs On:<br>Chr2, **P = 0.0014;<br>F (3, 15) = 5.809; | 9 mice per group  |
| 6k | Time spent in the stimulated chamber of                                                                 | One-way ANOVA                                                    | eYFP:<br>Pre vs Light, P = 0.2122;                                                                                                                                                                                                                                                  | 6                 |

|    |                                                                                                               |                                                                  |                                                                                                                                                                                                                                                                                                     |                  |
|----|---------------------------------------------------------------------------------------------------------------|------------------------------------------------------------------|-----------------------------------------------------------------------------------------------------------------------------------------------------------------------------------------------------------------------------------------------------------------------------------------------------|------------------|
|    | Chr2 and eYFP group in the RTPP test: pre vs light vs post                                                    | followed by Bonferroni's multiple comparisons test               | Pre vs Post, P = 0.5462;<br>Light vs Post, P = 0.7658;<br>F (2, 15) = 1.593;<br>Chr2:<br>Pre vs Light, **P = 0.0068;<br>Pre vs Post, *P = 0.0485;<br>Light vs Post, ns, P = 0.5901;<br>F (2, 15) = 6.951;                                                                                           | mice per group   |
| 6l | Distance moved in the OFT: pre vs light vs post                                                               | Two-way ANOVA followed by Bonferroni's multiple comparisons test | eYFP vs Chr2:<br>Pre, P = 0.2524;<br>Light, P = 0.1670;<br>Post, P = 0.083;<br>eYFP:<br>Pre vs Light, P > 0.9999;<br>Pre vs Post, P = 0.4933;<br>Light vs Post, P > 0.9999;<br>Chr2:<br>Pre vs Light, P > 0.9999;<br>Pre vs Post, P > 0.9999;<br>Light vs Post, P > 0.9999;<br>F (2, 12) = 0.05689. | 5 mice per group |
| 6l | Ratio of time spent in the periphery and center in the OFT: pre vs light vs post                              | Two-way ANOVA followed by Bonferroni's multiple comparisons test | eYFP vs Chr2:<br>Pre; Light; Post, P > 0.9999;<br>eYFP:<br>Pre vs Light, P > 0.9999;<br>Pre vs Post, P > 0.9999;<br>Light vs Post, P > 0.9999;<br>Chr2:<br>Pre vs Light, P > 0.9999;<br>Pre vs Post, P > 0.9999;<br>Light vs Post, P > 0.9999;<br>F (2, 12) = 0.07768;                              | 5 mice per group |
| 6n | Time-course of the CPN ligation in PWT and the effect of pharmacogenetic activation of GABAergic LPBN neurons | Two-way ANOVA followed by Bonferroni's multiple comparisons test | mCherry vs hM3Dq CNO:<br>Baseline, P = 0.9862;<br>day 3, P = 0.9994;<br>day 7, P = 0.9989;<br>day 8, P = 0.0886;<br>day 9, *P = 0.0210;<br>day 10, ****P < 0.0001;<br>day 11, ****P < 0.0001;<br>mCherry vs hM3Dq CNO + PTX:                                                                        | 8 mice per group |

|    |                                                                                                      |                                                                  |                                                                                                                                                                                                                                                  |                                     |
|----|------------------------------------------------------------------------------------------------------|------------------------------------------------------------------|--------------------------------------------------------------------------------------------------------------------------------------------------------------------------------------------------------------------------------------------------|-------------------------------------|
|    |                                                                                                      |                                                                  | Baseline, P = 0.7085;<br>day 3, P = 0.9872;<br>day 7, P >0.9999;<br>day 8, P = 0.2474;<br>day 9, *P = 0.0212;<br>day 10, ****P <0.0001;<br>day 11 (PTX), P = 0.9512.<br>F (6, 49) = 5.333;                                                       |                                     |
| 7b | Paw-withdraw thresholds of GtACR1 and eYFP group                                                     | Two-way ANOVA followed by Bonferroni's multiple comparisons test | eYFP vs GtACR1:<br>Off, P = 0.6941;<br>On, ****P <0.0001;<br>Off vs On:<br>eYFP, P >0.9999;<br>GtACR1, ****P <0.0001;<br>F(1, 18) = 22.26;                                                                                                       | 10 mice per group                   |
| 7c | Latency of the thermal paw-withdraw response of GtACR1 and eYFP group                                | Two-way ANOVA followed by Bonferroni's multiple comparisons test | eYFP vs GtACR1:<br>Off, P >0.9999;<br>On, **P = 0.0075;<br>Off vs On:<br>eYFP, P >0.9999;<br>GtACR1, ***P = 0.001;<br>F(1, 18) = 7.521;                                                                                                          | 10 mice per group                   |
| 7e | Time spent in the stimulated chamber of GtACR1 and eYFP group in the RTPA test: pre vs light vs post | One-way ANOVA followed by Bonferroni's multiple comparisons test | eYFP:<br>Pre vs Light, P = 0.9995;<br>Pre vs Post, P = 0.7081;<br>Light vs Post, P = 0.6900;<br>F (2, 15) = 0.4445;<br>GtACR1:<br>Pre vs Light, ****P <0.0001;<br>Pre vs Post, *P = 0.0178;<br>Light vs Post, *P = 0.0405;<br>F (2, 18) = 16.35; | eYFP:<br>n = 6;<br>GtACR1:<br>n = 7 |
| 7f | Distance moved in the OFT: pre vs light vs post                                                      | Two-way ANOVA followed by Bonferroni's multiple comparisons test | eYFP vs GtACR1:<br>Pre, P = 0.0610;<br>Light, P = 0.3569;<br>Post, P = 0.1740;<br>eYFP:<br>Pre vs Light, P > 0.9999;<br>Pre vs Post, P = 0.7484;<br>Light vs Post, P > 0.9999;<br>GtACR1:<br>Pre vs Light, P > 0.9999;                           | 5 mice per group                    |

|    |                                                                                                                                                  |                                                                  |                                                                                                                                                                                                                                                                                                                                     |                        |
|----|--------------------------------------------------------------------------------------------------------------------------------------------------|------------------------------------------------------------------|-------------------------------------------------------------------------------------------------------------------------------------------------------------------------------------------------------------------------------------------------------------------------------------------------------------------------------------|------------------------|
|    |                                                                                                                                                  |                                                                  | Pre vs Post, $P > 0.9999$ ;<br>Light vs Post, $P = 0.9286$ ;<br>$F(2, 24) = 0.1895$ ;                                                                                                                                                                                                                                               |                        |
| 7f | Ratio of time spent in the periphery and center in the OFT: pre vs light vs post                                                                 | Two-way ANOVA followed by Bonferroni's multiple comparisons test | eYFP vs GtACR1:<br>Pre, $P = 0.7191$ ;<br>Light, $P > 0.9999$ ;<br>Post, $P = 0.7700$ ;<br>eYFP:<br>Pre vs Light, $P > 0.9999$ ;<br>Pre vs Post, $P = 0.6744$ ;<br>Light vs Post, $P > 0.9999$ ;<br>GtACR1:<br>Pre vs Light, $P > 0.9999$ ;<br>Pre vs Post, $P = 0.8193$ ;<br>Light vs Post, $P = 0.9571$ ;<br>$F(2, 24) = 1.619$ ; | 5 mice per group       |
| 7h | c-Fos <sup>+</sup> neurons number in the GtACR1 vs eYFP group                                                                                    | unpaired t test                                                  | **** $P < 0.0001$ ;<br>$t = 20.6$ ;<br>d.f. = 12;                                                                                                                                                                                                                                                                                   | 6 mice per group       |
| 7i | c-Fos <sup>+</sup> neurons number in the GtACR1 vs eYFP group                                                                                    | unpaired t test                                                  | $P = 0.7076$ ;<br>$t = 0.386$ ;<br>d.f. = 10;                                                                                                                                                                                                                                                                                       | 6 mice per group       |
| 7j | Proportion of c-Fos-positive cells that co-express GAD2-eYFP or CaMKII $\alpha$ <sup>+</sup> cells                                               | unpaired t test                                                  | **** $P < 0.0001$ ;<br>$t = 24.98$ ;<br>d.f. = 10;                                                                                                                                                                                                                                                                                  | 6 mice per group       |
| 8j | Time course of summarized changes in spike frequency (Hz) of LPBN CaMKII $\alpha$ neurons induced by light stimulation of GABAergic LPBN neurons | One-way ANOVA followed by Bonferroni's multiple comparisons test | Average of -5 to -1 s vs 1 s, *** $P = 0.0001$ ;<br>average of -5 to -1 s vs 2, 3, 4, 5, 6, 7, 8, and 9 s, **** $P < 0.0001$ ;<br>average of -5 to -1 s vs 10 s, * $P = 0.0462$ ;<br>average of -5 to -1 s vs 11, 12, 13, 14, and 15 s, $P > 0.9999$ ;<br>$F(15, 144) = 37.57$                                                      | 10 neurons from 3 mice |
| 8k | Averaged firing frequency of LPBN CaMKII $\alpha$ neurons                                                                                        | One-way ANOVA followed by                                        | Before vs During, **** $P < 0.0001$ ; Before vs After 0-5s, **** $P < 0.0001$ ; Before                                                                                                                                                                                                                                              | 10 neurons             |

|    |                                                      |                                                                  |                                                                                                                                                                                                                                                              |                  |
|----|------------------------------------------------------|------------------------------------------------------------------|--------------------------------------------------------------------------------------------------------------------------------------------------------------------------------------------------------------------------------------------------------------|------------------|
|    |                                                      | Bonferroni's multiple comparisons test                           | vs After 5–10s, $P > 0.9999$ ; During vs After 0–5s, $P > 0.9999$ ; During vs After 5–10s, **** $P < 0.0001$ ; After 0–5s vs After 5–10s, **** $P < 0.0001$ ; $F(3, 196) = 128.6$ .                                                                          | s from 3 mice    |
| 9b | Time-course of PWT changes                           | Two-way ANOVA followed by Bonferroni's multiple comparisons test | hM3Dq-Saline vs hM3Dq-CNO: Baseline, 0, 1, $P > 0.9999$ ; 3, * $P = 0.0153$ ; 5, 7, 9, 11, 13, **** $P < 0.0001$ ; 21, **** $P < 0.0001$ ; 30, **** $P < 0.0001$ ; $F(1, 8) = 138.4$ ;                                                                       | 5 mice per group |
| 9e | Time spent in the stimulated chamber in the CPA test | unpaired t test                                                  | mCherry: $P = 0.4865$ ; $t = 0.7296$ .<br>hM3Dq: *** $P = 0.0004$ ; $t = 5.277$ .                                                                                                                                                                            | 8 mice per group |
| 9g | Time-course of PWT changes                           | Two-way ANOVA followed by Bonferroni's multiple comparisons test | DIO-eYFP + CaMKII $\alpha$ -mCherry CNO vs DIO-ChR2 + CaMKII $\alpha$ -hM3Dq CNO : Baseline, $P = 0.9005$ ; 1, $P = 0.9954$ , 3, * $P = 0.0328$ ; 5, 7, 9, 11, 13, 15, 17, **** $P < 0.0001$ ; day 21 On, $P = 0.3468$ ; day 21 Off, **** $P < 0.0001$ ;     | 8 mice per group |
| 9i | Time-course of PWT changes                           | Two-way ANOVA followed by Bonferroni's multiple comparisons test | mCherry-CPN vs hM3Dq-CPN: Baseline, $P > 0.9999$ ; 1, $P > 0.9999$ ; 3, ** $P = 0.0063$ ; 5, ** $P = 0.0013$ ; 7, 9, 11, 13, 15, 28, **** $P < 0.0001$ ;<br>hM3Dq-Sham vs hM3Dq-CPN): Baseline, $P > 0.9999$ ; 1, 3, 5, 7, 9, 11, 13, 15, 28, $P > 0.9999$ ; | 5 mice per group |

|    |                                                        |                                                                  |                                                                                                                                                                                                                                                                                          |                  |
|----|--------------------------------------------------------|------------------------------------------------------------------|------------------------------------------------------------------------------------------------------------------------------------------------------------------------------------------------------------------------------------------------------------------------------------------|------------------|
| 9k | c-Fos-positive cells in the LPBN from different groups | One-way ANOVA followed by Bonferroni's multiple comparisons test | mCherry Sham vs mCherry CPN, ****P <0.0001;<br>mCherry Sham vs hM3Dq Sham, P = 0.9235;<br>mCherry Sham vs hM3Dq CPN, P = 0.4521;<br>mCherry CPN vs hM3Dq Sham, ****P <0.0001;<br>mCherry CPN vs hM3Dq CPN, ****P < 0.0001;<br>hM3Dq Sham vs hM3Dq CPN, P > 0.9999.<br>F (3, 12) = 42.66. | 4 mice per group |
|----|--------------------------------------------------------|------------------------------------------------------------------|------------------------------------------------------------------------------------------------------------------------------------------------------------------------------------------------------------------------------------------------------------------------------------------|------------------|



**Supplementary Table 2. Key Resources**

| <b>REAGENT or RESOURCE</b>                    | <b>SOURCE</b>                             | <b>IDENTIFIER</b> |
|-----------------------------------------------|-------------------------------------------|-------------------|
| <b>Primary Antibodies</b>                     |                                           |                   |
| Guinea pig anti-c-Fos                         | SYSY                                      | Cat# 226004       |
| Rabbit anti-c-Fos                             | SYSY                                      | Cat# 226003       |
| Rabbit anti-CaMKII $\alpha$                   | Abcam                                     | Cat# ab52476      |
| Mouse anti-Vgat                               | SYSY                                      | Cat# 131011       |
| DsRed living colors                           | Takara                                    | Cat# 632496       |
| <b>Secondary Antibodies</b>                   |                                           |                   |
| Donkey anti-Guinea pig Alexa Fluor 488        | Jackson ImmunoResearch Laboratories, Inc. | Cat# 706-545-148  |
| Donkey anti-rabbit Cy3                        | Jackson ImmunoResearch Laboratories, Inc. | Cat# 711-165-152  |
| Donkey anti-Guinea pig Cy3                    | Jackson ImmunoResearch Laboratories, Inc. | Cat# 706-165-148  |
| Donkey anti-rabbit Alexa Fluor 488            | Jackson ImmunoResearch Laboratories, Inc. | Cat# 711-545-152  |
| Donkey anti-mouse Alexa Fluor 488             | Invitrogen                                | Cat# A21202       |
| <b>RNAscope in situ hybridization</b>         |                                           |                   |
| RNAscope Multiplex Fluorescent Reagent Kit v2 | Advanced Cell Diagnostics                 | Cat# 323100       |

|                                                  |                                              |              |
|--------------------------------------------------|----------------------------------------------|--------------|
| RNAscope Probe-Mm-Gad1-C2                        | Advanced Cell Diagnostics                    | Cat# 400951  |
| RNAscope Probe-Mm-Pvalb-C3                       | Advanced Cell Diagnostics                    | Cat# 421931  |
| RNAscope Probe-Mm-Slc17a6-C3                     | Advanced Cell Diagnostics                    | Cat# 319171  |
| RNAscope Probe-Mm-Cck-C1                         | Advanced Cell Diagnostics                    | Cat# 402271  |
| RNAscope Probe-Mm-Sst-C1                         | Advanced Cell Diagnostics                    | Cat# 404631  |
| RNAscope Negative control probe<br>dapB          | Advanced Cell Diagnostics                    | Cat# 310043  |
| RNAscope Positive control probe<br>Mm-Ppib       | Advanced Cell Diagnostics                    | Cat# 313911  |
| <b>Virus Strains</b>                             |                                              |              |
| AAV2/9-CamKII $\alpha$ -hChr2(H134R)-<br>mCherry | Shanghai SunBio Biomedical<br>technology Co. | N/A          |
| AAV2/9-CamKII $\alpha$ -mCherry                  | Shanghai SunBio Biomedical<br>technology Co. | N/A          |
| AAV2/8-EF1 $\alpha$ -DIO-eYFP                    | Shanghai Taitool Bioscience<br>Co.           | Cat# S0196-8 |
| AAV2/9-EF1 $\alpha$ -DIO-ChR2-eYFP               | Shanghai Taitool Bioscience<br>Co.           | Cat# S0199   |

|                                              |                                           |                  |
|----------------------------------------------|-------------------------------------------|------------------|
| AAV2/9-CamKII $\alpha$ -eNpHR3.0-mCherry     | Shanghai SunBio Biomedical technology Co. | Cat# S0464-9     |
| AAV2/9-EF1 $\alpha$ -DIO-eNpHR3.0-eYFP       | Shanghai Taitool Bioscience Co.           | Cat# S0178-9     |
| AAV2/9-hSyn-DIO-hM3Dq-mCherry                | Shanghai SunBio Biomedical technology Co. | Cat# S0144-9-H20 |
| AAV2/9-CaMKII $\alpha$ -hM3Dq-mCherry        | Shanghai Taitool Bioscience Co.           | Cat# S0484-9     |
| AAV2/8-EF1 $\alpha$ -DIO-mCherry             | Shanghai SunBio Biomedical technology Co  | N/A              |
| AAV9-EF1 $\alpha$ -DIO-hGtACR1-P2A-eYFP-WPRE | Shanghai Taitool Bioscience Co.           | Cat# S0311-8     |
| AAV-CAG-DIO-TVA-eGFP                         | BrainVTA Wuhan                            | Cat# AAV-903     |
| AAV-CAG-DIO-RG                               | BrainVTA Wuhan                            | Cat# AAV-902     |
| RV-EnvA-DsRed                                | BrainVTA Wuhan                            | Cat# RV-306      |
| AAV2/9-hSyn-DIO-GCaMP7s-WPRE                 | Shanghai Taitool Bioscience Co.           | Cat# S0590-9-H20 |
| <b>Chemicals</b>                             |                                           |                  |
| Clozapine N-oxide                            | Enzo Life Sciences, Inc.                  | Cat # NS105-0025 |
| DAPI                                         | Sigma-Aldrich                             | N/A              |

| <b>Experimental Animals</b>                                 |                                                                             |                                                                                           |
|-------------------------------------------------------------|-----------------------------------------------------------------------------|-------------------------------------------------------------------------------------------|
| vGAT-ChR2(H134R)-eYFP                                       | The Jackson Laboratory                                                      | JAX014548                                                                                 |
| GAD2-ires-Cre (B6N.Cg-<br>Gad2 <sup>tm2(cre)Zjh/J</sup> )   | The Jackson Laboratory                                                      | JAX019022                                                                                 |
| C57BL6/J                                                    | Shanghai SLAC Laboratory<br><br>Animal Co. Ltd                              | <a href="http://www.slaccas.com/">http://www.slaccas.com/</a>                             |
| VgluT2-ires-Cre ( <u>Slc17a6<sup>tm2(cre)Low1/J</sup></u> ) | The Jackson Laboratory                                                      | JAX016963                                                                                 |
| Gad67-GFP                                                   | From the <i>Takeshi Kaneko</i><br><br>laboratory of Kyoto<br><br>University | N/A                                                                                       |
| <b>Software and Code</b>                                    |                                                                             |                                                                                           |
| ANY-Maze software 5.3                                       | Global Biotech Inc.                                                         | <a href="http://www.anymaze.co.uk/">http://www.anymaze.co.uk/</a>                         |
| Plantar Test apparatus                                      | IITC Life Science Inc.                                                      | <a href="http://www.iitcinc.com/">http://www.iitcinc.com/</a>                             |
| Implantable Optical Fibers                                  | Anlai, Ningbo                                                               | <a href="http://www.anilab.cn/">http://www.anilab.cn/</a>                                 |
| Image J                                                     | NIH                                                                         | <a href="https://imagej.nih.gov/ij/index.html">https://imagej.nih.gov/ij/index.html</a> ; |

|                         |                                         |                                                                                                                                                          |
|-------------------------|-----------------------------------------|----------------------------------------------------------------------------------------------------------------------------------------------------------|
| GraphPad Prism 6        | GraphPad Software                       | <a href="https://www.graphpad.com/scientificsoftware/prism/">https://www.graphpad.com/scientificsoftware/prism/</a> ;RRID:<br><a href="#">SCR_002798</a> |
| Fiber photometry system | Thinker Tech Nanjing<br>Bioscience Inc. | N/A                                                                                                                                                      |
| MatLab R2016a           | MathWorks                               | <a href="https://www.mathworks.com/products.html">https://www.mathworks.com/products.html</a> ;<br>RRID: <a href="#">SCR_001622</a>                      |
